# Supplementary material for: Sensorimotor Oscillations in Human Infants during an Innate Rhythmic Movement
Source: MDPI journal article supplement (doi:10.3390/brainsci14040402), 2024-04-20
Supplement: s1 [file s1]

**Supplementary Materials:** The following supporting information can be downloaded at: [www.mdpi.com/xxx/s1](http://www.mdpi.com/xxx/s1).

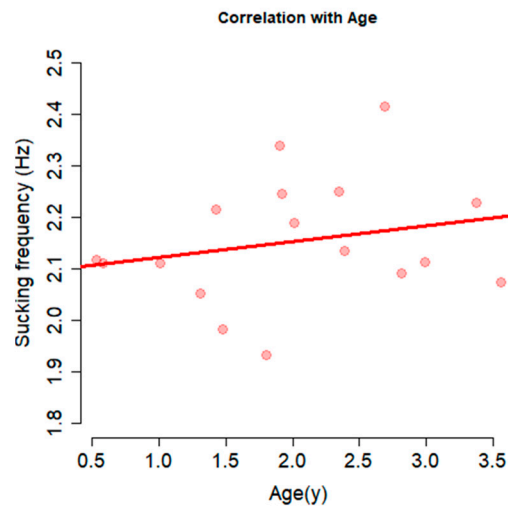

**Figure S1.** Correlation of sucking frequency with age. No significant correlation was found between sucking frequency (Hz) and the subjects age (y),  $R^2 = 0.05$ ,  $p = 0.4$ . Points represent individual subjects, while continuous line represents the best linear fit.

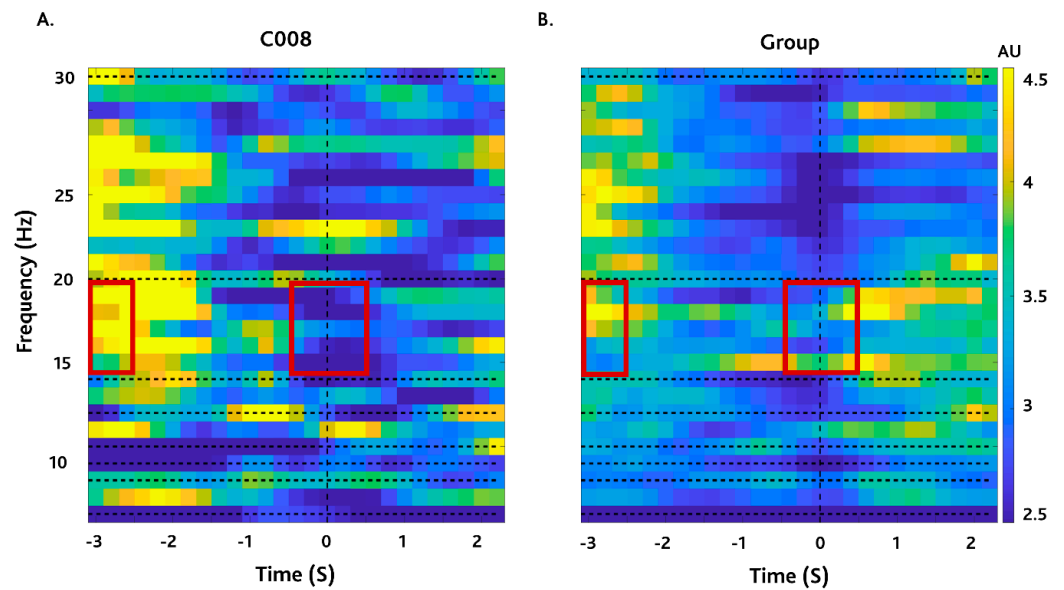

**Figure S2. Time-frequency plot.** x-axes represent time (S) and y-axes frequency (Hz). The red lines delimit the time-frequency bins resulted significant from the linear mixed model analyses. (A) Example of heat map obtained from typical subject (C008, age= 1.9). (B) Heat map that includes all subjects.

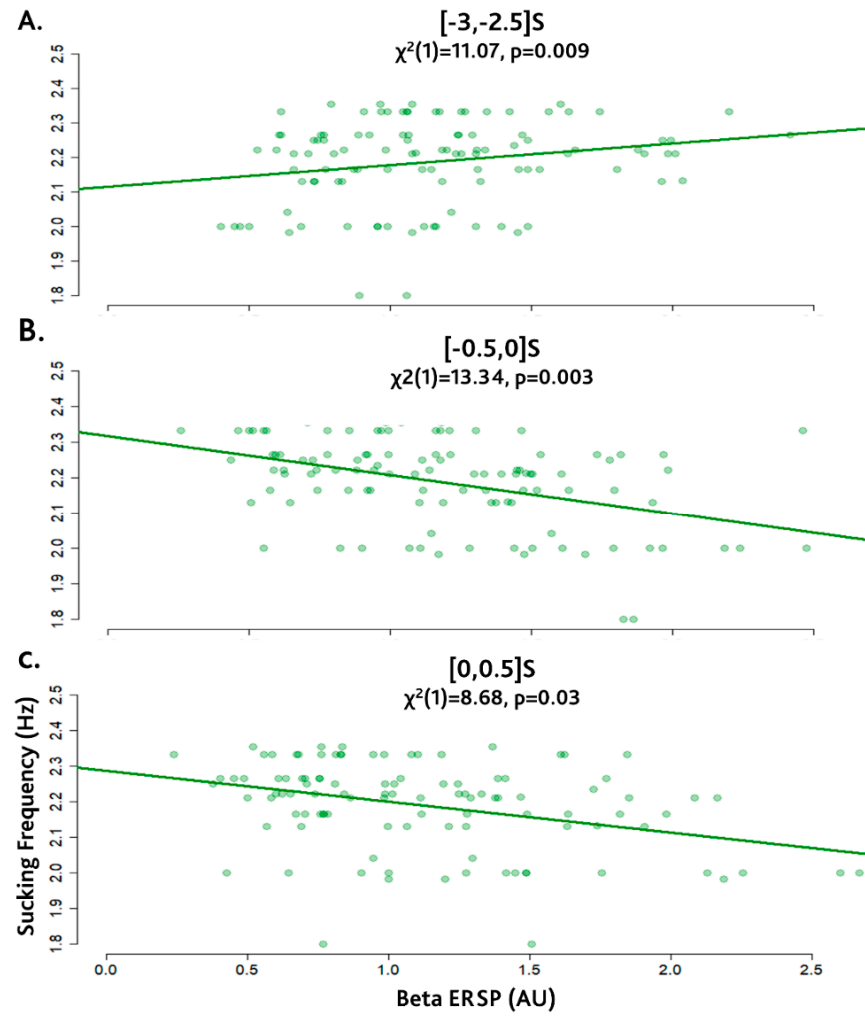

**Figure S3. Correlations for each time window.** Significant associations were found between relative beta ERSP (arbitrary units, AU) and sucking frequency (Hz). Each point represents a single trial, while continuous lines represent the best linear fit. (A), (B) and (C) show the associations in the significant time windows, respectively  $[-3, -2.5]S$ ,  $[-0.5, 0]S$  and  $[0, 0.5]S$ .

**Table S1.** Individual subject data. Individual subject data at different ages showing the specific non-nutritive sucking (NNS) frequency and relative power of mu and beta activity during baseline and sucking period.

| Code | Fractional age | Biological Sex | SF (Hz) | Baseline relative power (%) |         |         | NNS relative power (%) |         |         |
|------|----------------|----------------|---------|-----------------------------|---------|---------|------------------------|---------|---------|
|      |                |                |         | $\mu 1$                     | $\mu 2$ | $\beta$ | $\mu 1$                | $\mu 2$ | $\beta$ |
| C001 | 0.53           | M              | 2.12    | 0.6862                      | 0.4086  | 0.2108  | 0.4570                 | 0.2852  | 0.1113  |
| C002 | 0.58           | F              | 2.11    | 0.4403                      | 0.3643  | 0.0977  | 0.4484                 | 0.2318  | 0.1280  |
| C003 | 1.01           | F              | 2.11    | 0.5777                      | 0.2641  | 0.1913  | 0.5195                 | 0.2135  | 0.0981  |
| C004 | 1.31           | F              | 2.05    | 1.3126                      | 0.3757  | 0.1634  | 1.5741                 | 0.7329  | 0.1301  |
| C005 | 1.43           | F              | 2.22    | 4.0068                      | 0.4753  | 0.2819  | 3.4500                 | 0.3963  | 0.2161  |
| C006 | 1.48           | F              | 1.98    | 1.9150                      | 0.8491  | 0.3739  | 0.5678                 | 0.2857  | 0.1175  |
| C007 | 1.80           | M              | 1.93    | 1.7881                      | 0.3942  | 0.2710  | 0.5215                 | 0.2660  | 0.1148  |
| C008 | 1.90           | F              | 2.34    | 3.2554                      | 0.8381  | 0.3822  | 3.7801                 | 0.8326  | 0.3742  |
| C009 | 1.92           | M              | 2.25    | 1.5316                      | 0.5621  | 0.1690  | 1.9951                 | 0.9746  | 0.2386  |
| C010 | 2.01           | M              | 2.19    | 0.7811                      | 0.3063  | 0.1382  | 1.1779                 | 0.3390  | 0.1442  |
| C011 | 2.35           | M              | 2.25    | 1.3074                      | 0.5039  | 0.3428  | 0.7736                 | 0.3587  | 0.2283  |
| C012 | 2.39           | M              | 2.13    | 2.3704                      | 0.4849  | 0.3376  | 4.5930                 | 0.8096  | 0.3907  |
| C013 | 2.69           | M              | 2.41    | 5.5940                      | 0.4866  | 0.1913  | 4.9814                 | 0.8331  | 0.3641  |
| C014 | 2.82           | M              | 2.09    | 1.7985                      | 0.7566  | 0.3534  | 1.5006                 | 0.3924  | 0.1743  |
| C015 | 2.99           | M              | 2.11    | 2.3689                      | 0.9839  | 0.3029  | 2.8824                 | 1.7203  | 0.3129  |
| C016 | 3.38           | M              | 2.23    | 1.7705                      | 0.7795  | 0.3834  | 0.9044                 | 0.4201  | 0.2771  |
| C017 | 3.56           | M              | 2.07    | 1.2630                      | 0.7858  | 0.3636  | 1.2456                 | 0.7292  | 0.3113  |
